1 **Unplugging DI-DIV and DII-DIII lateral fenestrations of**  
2 **NALCN reveals unexpected pharmacology**

3

4 **Katharina Schott, Stephan Alexander Pless, Han Chow Chua\*\***

5 Department of Drug Design and Pharmacology, University of Copenhagen, Jagtvej 160, 2100  
6 Copenhagen, Denmark.

7 \*Corresponding author. Email: [chow.chua@sydney.edu.au](mailto:chow.chua@sydney.edu.au)

8 #Current address: A15 Pharmacy and Bank Building, Science Road, The University of  
9 Sydney 2006 Camperdown, Sydney, Australia.

10

11

12

13

14

15

16

17

18

19

20

21

22

23

## 24 **Abstract**

25 The sodium (Na<sup>+</sup>) leak channel (NALCN) is a member of the four-domain voltage-gated cation  
26 channel family that includes the prototypical voltage-gated sodium and calcium channels (Navs  
27 and Cavs, respectively). Unlike Navs and Cavs, which have four intramembrane fenestrations  
28 that serve as routes for lipophilic compounds to enter the central cavity to modulate channel  
29 function, NALCN has bulky residues (W311, L588, M1145 and Y1436) that block these  
30 openings. Structural data suggest that occluded lateral fenestrations underlie the  
31 pharmacological resistance of NALCN, but functional evidence is lacking. To test this  
32 hypothesis, we unplugged the fenestrations of NALCN by substituting the four aforementioned  
33 residues with alanine (AAAA) and compared the effects of Nav, Cav and NALCN blockers on  
34 both wild-type (WT) and AAAA channels. Most compounds behaved in a similar manner on  
35 both channels, but phenytoin and 2-aminoethoxydiphenyl borate (2-APB) elicited additional,  
36 distinct responses on AAAA channels, highlighting the existence of drug binding sites beyond  
37 the occluded fenestrations of NALCN. Further experiments using single alanine mutants  
38 revealed that phenytoin and 2-APB access their putative binding sites through distinct  
39 fenestrations, implying structural specificity to their modes of access. Intrigued by the activity  
40 of 2-APB and its analogues, we tested more compounds containing the diphenylmethane/amine  
41 moiety on WT channels. We identified novel compounds that exhibited diverse activity, thus  
42 expanding the pharmacological toolbox for NALCN. While the low potencies of active  
43 compounds reiterate the resistance of NALCN to pharmacological targeting, our findings lay  
44 the foundation for rational drug design to develop NALCN modulators with refined properties.

45

46

47

48

49

50

51

52

## 53 Introduction

54 NALCN mediates a tonic Na<sup>+</sup> conductance that contributes to the resting membrane potential  
55 (RMP) of excitable and non-excitable cells. Over the last two decades, animal studies have  
56 shown that NALCN function regulates various bodily processes such as respiration, motor  
57 function, pain sensitivity, circadian rhythm and cancer metastasis (1-9). In humans, dysfunction  
58 that arises from NALCN mutations has detrimental effects on health. Evidence from clinical  
59 studies indicates that *de novo* missense mutations can cause congenital contractures of the  
60 limbs and face, resulting in characteristic facial features, hypotonia and variable degrees of  
61 developmental delay (CLIFAHDD), whereas homozygous mutations are linked to infantile  
62 hypotonia with psychomotor retardation and characteristic facies (IHPRF1) (10-14). The  
63 physiological significance of NALCN has garnered much interest in the ion channel field, but  
64 challenges associated with functional expression have left NALCN lagging considerably  
65 behind other closely related channels in terms of the understanding of its structure, function  
66 and pharmacology (15-18).

67

68 As a member of the four-domain voltage-gated cation channel family, NALCN shares a  
69 common topology with the prototypical Navs and Cavs. These large membrane proteins are  
70 composed of four homologous but non-identical domains connected via intracellular linkers.  
71 Each of the four domains (DI–DIV) contains six transmembrane segments (S1–S6), with S1–  
72 S4 forming the voltage-sensing domains (VSDs) and S5–S6 forming the pore domains (PDs).  
73 The four VSDs are situated peripherally to a central ion-conducting pore, working in concert  
74 to couple membrane depolarisation to cation influx. Despite the conserved channel architecture,  
75 NALCN stands out from Navs and Cavs due to its unusual functional and pharmacological  
76 profiles. First, a prerequisite for NALCN function is the formation of a massive channelosome  
77 with three non-conducting auxiliary subunits: uncoordinated protein 79 (UNC79),  
78 uncoordinated protein 80 (UNC80) and family with sequence similarity 155 member A  
79 (FAM155A, also known as NALCN auxiliary factor 1 (NALF1)) (19, 20). Second, while  
80 canonical Navs and Cavs cycle between distinct closed, activated and inactivated states in  
81 response to hyperpolarisation and depolarisation of the membrane potential, NALCN shows  
82 constitutive activity that is modulated by voltage and extracellular divalent cations (19). Third,  
83 NALCN exhibits strikingly low open channel probability ( $P_o$ ) even during periods of high  
84 activity ( $P_o \sim 0.04$  at -60 mV) (21). Fourth, NALCN is resistant to pharmacological targeting,

85 with the most potent inhibitor known to date being the trivalent cation gadolinium ( $Gd^{3+}$ ), a  
86 promiscuous inhibitor of miscellaneous ion channels including Navs, Cavs, mechanosensitive,  
87 stretch-activated and transient receptor potential (TRP) channels (1, 19, 22).

88

89 In stark contrast to the lack of NALCN-specific pharmacology, Navs and Cavs are modulated  
90 by a vast array of natural and synthetic compounds. Animal and plant toxins generally inhibit  
91 Nav and Cav function either by blocking the extracellular mouth of the ion permeation pathway  
92 or binding to the VSDs to modify channel gating (23-25). On the other hand, numerous  
93 lipophilic blockers travel across intramembrane lateral fenestrations that exist between specific  
94 interfaces of two adjacent PDs to directly occlude the central pore (**Fig. S1A**). An impressive  
95 list of clinically used drugs such as anaesthetic (e.g., lidocaine) (26), antiarrhythmic (e.g.,  
96 flecainide) (27), antihypertensive and antianginal (e.g., verapamil and diltiazem) (28),  
97 antispasmodic (e.g., otinolum bromide) (29), and motion sickness drugs (e.g., cinnarizine) (30)  
98 enter the central cavity through these routes to inhibit Navs and Cavs. In addition, lateral  
99 fenestrations also house allosteric binding sites for inhibitors to negatively modulate channel  
100 function without directly blocking the pore. For example, dihydropyridine Cav blockers such  
101 as amlodipine and nifedipine bind to the fenestration between the PDs of DIII and DIV (the  
102 DIII-DIV fenestration) of Cav1.1 to inhibit channel function (28, 31). Lipids are also frequent  
103 occupants of the fenestrations, with evidence suggesting that they can modulate channel  
104 function and help coordinate binding of drugs (28, 29, 32-34). Taken together, lateral  
105 fenestrations are an integral structure feature of Navs and Cavs that serve both as key drug  
106 access pathways as well as drug binding sites.

107

108 Since 2020, we have seen the determination of multiple structures of the NALCN  
109 channelosome (21, 22, 35-38). This nearly one-megadalton complex includes (1) the  
110 membrane-embedded NALCN, (2) the auxiliary subunit FAM155A forming a dome that sits  
111 above the channel, and (3) UNC79 and UNC80 forming a massive, intertwined superhelical  
112 assembly that docks intracellularly to the bottom of NALCN (**Fig. S1B**). The extracellular  
113 dome of FAM155A has been postulated to physically prevent molecules from accessing the  
114 selectivity filter, which may explain the insensitivity of NALCN to toxins that rely on this route  
115 to inhibit related channels (22). Despite having a central cavity with comparable volume to the  
116 classical drug-receptor site in Navs and Cavs, four S6 residues (W311 of DI, L588 of DII,  
117 M1145 of DIII and Y1436 of DIV) appear to plug the lateral fenestrations in NALCN (**Fig.**

118 **S3A**). Based on this structural observation, an obvious question arises: could the occluded  
119 lateral fenestrations of NALCN serve as barricades to prevent drug entry, and hence contribute  
120 to the pharmacological resistance of this idiosyncratic channel? In this study, we sought to  
121 understand the impact of unplugging the lateral fenestrations on NALCN pharmacology and to  
122 expand the NALCN pharmacological toolbox.

123

## 124 **Results**

### 125 **Alanine substitutions at the lateral gateways of NALCN widen fenestrations *in silico***

126 To identify the lateral fenestrations of NALCN or the lack thereof, we first subjected WT  
127 channel structure (PDB 7SX3) through an automatic tunnel detection software, MOLE 2.5 (See  
128 Materials and methods for details). While we did not identify a tunnel at the DIII-DIV interface,  
129 we found predicted lateral tunnels at the DI-DII, DII-DIII and DI-DIV interfaces of the WT  
130 channel. However, these tunnels were narrow (bottleneck radii of DI-DII=0.9 Å, DII-DIII=1.0  
131 Å, DI-DIV=1.2 Å; **Fig. 1A**), echoing previous speculation that NALCN lacks lateral  
132 fenestrations that can serve as routes for small molecule entry into the central cavity (22). For  
133 comparison purposes, we also analysed apo structures of Nav1.5 (PDB 6UZ3) and Cav3.3  
134 (PDB 7WLI). Consistent with the idea that lipids and lipophilic compounds pass through the  
135 lateral fenestrations of these channels, we detected wider lateral tunnels (bottleneck radii > 2.0  
136 Å) at most domain interfaces (**Fig. S1C**). Next, we substituted the four key bottleneck residues  
137 of each interface of NALCN (W311 of DI, L588 of DII, M1145 of DIII, and Y1436 of DIV)  
138 with alanine *in silico* (mutagenesis performed using Pymol) and applied the same analysis.  
139 This four-fold alanine (AAAA) mutant, in stark contrast to the WT channel, had lateral tunnels  
140 through DI-DII, DII-DIII, DIII-DIV and DI-DIV interfaces that were noticeably wider (**Fig.**  
141 **1A**). The DI-DIV fenestration had the largest bottleneck radius of 2.7 Å, followed by DII-DIII  
142 (2.5 Å), DIII-DIV (2.2 Å) and finally DI-DII, which was the narrowest with a bottleneck radius  
143 of 1.7 Å. A simple interpretation of these results is that the four-fold alanine substitution  
144 widened the lateral fenestrations of NALCN, with two out of the four potential fenestrations  
145 (DII-DIII and DI-DIV) having radii wide enough to accommodate compound entry. To verify  
146 these predictions, we proceeded to evaluate the function and pharmacology of the AAAA  
147 channel *in vitro*.

148

149

## 150 **Functional characterisation of the alanine mutants in *Xenopus laevis* oocytes**

151 To determine the effect of these alanine mutations on channel function, we introduced single  
152 (W311A, L588A, M1145A and Y1436A) and four-fold alanine mutations into NALCN using  
153 site-directed mutagenesis and expressed these mutant channels with the auxiliary subunits  
154 UNC79, UNC80 and FAM155A in *Xenopus laevis* oocytes. We then measured voltage-evoked  
155 currents from each construct using the two-electrode voltage-clamp technique five days post  
156 RNA injection. As the NALCN channel complex is highly sensitive to inhibition by  
157 physiological concentrations of extracellular divalent cations such as  $\text{Ca}^{2+}$  and  $\text{Mg}^{2+}$ , we  
158 performed our recordings in  $\text{Ca}^{2+}$ - and  $\text{Mg}^{2+}$ -free buffer (substituted with  $\text{Ba}^{2+}$ ). WT NALCN  
159 channel conducted robust currents in response to depolarisation and hyperpolarisation from a  
160 holding potential of 0 mV ( $4.4 \pm 0.9 \mu\text{A}$  at +80 mV;  $2.6 \pm 1.0 \mu\text{A}$  at -80 mV;  $n=73$ ; **Fig. 1B and**  
161 **C**). The AAAA mutant channel showed a small but significant decrease in current amplitudes  
162 ( $3.7 \pm 0.6 \mu\text{A}$  at +80 mV;  $1.9 \pm 0.6 \mu\text{A}$  at -80 mV;  $n=75$ ;  $p < 0.0001$ ; one-way ANOVA, Dunnett's  
163 test (compared to WT); **Fig. 1B and C**). The single W311A mutation unexpectedly resulted in  
164 markedly lower current amplitudes both in the outward and inward directions ( $1.9 \pm 0.5 \mu\text{A}$  at  
165 +80 mV;  $0.6 \pm 0.1 \mu\text{A}$  at -80 mV;  $n=14$ ;  $p < 0.0001$ ; one-way ANOVA, Dunnett's test (compared  
166 to WT); **Fig. 1B and C**). The remaining three single mutants L588A, M1145A and Y1436A  
167 behaved similarly to WT channels, with no significant differences in current amplitudes, except  
168 for a slight increase for Y1436A at hyperpolarised potentials ( $4.0 \pm 1.9 \mu\text{A}$  at -80 mV;  $n=14$ ;  
169  $p < 0.0001$ ; one-way ANOVA, Dunnett's test (compared to WT); **Fig. 1B and C**). We also  
170 observed apparent differences in the current deactivation kinetics in response to  
171 hyperpolarising voltage steps with some of the mutants (e.g., M1145A and Y1436A; **Fig. 1B**),  
172 but did not further investigate this effect.

173

## 174 **Pharmacological screening reveals distinct responses for phenytoin and 2-APB on WT** 175 **and AAAA channels**

176 Having established that the AAAA mutant channel displayed WT-like function, we evaluated  
177 if the fenestrations or the central cavity of NALCN houses potential drug binding sites. We  
178 hypothesised that by widening the lateral fenestrations of NALCN, some compounds that are  
179 ineffective on WT channel would exert modulatory effect on the AAAA channel. Alternatively,  
180 previously reported inhibitors of NALCN may have increased potency or additional, previously  
181 unseen effects on the mutant channel. To test this hypothesis, we expressed both WT and

182 AAAA channel complexes in *Xenopus laevis* oocytes and then measured their responses to 13  
183 lipophilic channel modulators. We chose these compounds either for their ability to enter Navs  
184 or Cav<sub>s</sub> via the lateral fenestrations or for their reported inhibitory effect on NALCN.  
185 Considering the pharmacological resistance of NALCN, we started testing each compound  
186 with the maximum soluble concentration achievable or 1 mM if solubility was not an issue  
187 (concentration range=100 μM to 1 mM).

188

189 Overall, the effects of these compounds on both WT and AAAA channels were diverse (**Fig.**  
190 **2A and B**). Five out of the 13 compounds tested (carbamazepine, lidocaine, phenytoin,  
191 lacosamide, and Z944) showed no effect on WT channels; two selectively inhibited the outward  
192 (CP96345) or inward (lamotrigine) currents; three inhibited the outward and potentiated the  
193 inward currents (quinidine, diltiazem, and propafenone); three inhibited both outward and  
194 inward currents (nifedipine, L-703,606, and 2-APB). In addition to the effects on current  
195 amplitudes, we also observed changes in current phenotype. For example, the application of  
196 quinidine, diltiazem, propafenone and CP96435 resulted in a “hooked” current at  
197 hyperpolarized potentials, suggesting that these compounds may have an impact on channel  
198 gating (**Fig. 2A**).

199

200 The AAAA mutant channel responded similarly to the WT channel for most of these  
201 compounds, except for phenytoin and 2-APB. While the application of 300 μM phenytoin had  
202 no effect on WT channel currents, it significantly inhibited the inward current of AAAA  
203 channels (64.8±6.7 % inhibition at -100 mV;  $n=13$ ;  $p<0.0001$ ; one-way ANOVA, Dunnett’s  
204 test (compared to WT); **Fig. 2A and B**). We have previously reported the inhibitory effect of  
205 2-APB on NALCN (22). On WT channels, 1 mM 2-APB had a more prominent effect on  
206 inward (70.2±8.2 % inhibition at -100 mV;  $n=17$ ) than outward current (23.2±26.7 % inhibition  
207 at +80 mV). The blocking effect of 2-APB was reversible, evident from the full recovery of  
208 currents after washout for two minutes (**Fig. 2A**). By contrast, 1 mM 2-APB only weakly  
209 inhibited the inward current of the AAAA mutant (32.9±12.9 % inhibition at -100 mV;  $n=21$ ;  
210 **Fig. 2B**). We also occasionally observed slight activation of the outward current (30.5±27.0 %  
211 of activation at +80 mV). To our surprise, following the removal of 2-APB with a two-minute  
212 washout, the AAAA mutant channel showed even greater activation in both inward  
213 (167.9±50.3 %) and outward (227.7±122.4 %) directions.

214

### 215 **Phenytoin inhibits M1145A and 2-APB activates W311A**

216 To determine if phenytoin and 2-APB elicited their unique responses at AAAA channels via  
217 specific lateral fenestrations, we tested these compounds on individual alanine mutants. Like  
218 WT channels, the W311A, L588A and Y1436A mutants did not react to 300  $\mu$ M phenytoin  
219 (**Fig. 3A**). The M1145A mutant, on the other hand, showed noticeably reduced currents in  
220 response to phenytoin ( $31.0 \pm 9.2$  % of inhibition at -100 mV;  $n=11$ ;  $p < 0.0001$ ; one-way  
221 ANOVA, Dunnett's test (compared to WT); **Fig. 3A**). For 2-APB, the reversible inhibitory  
222 effect observed on WT channels (**Fig. 2**) was replicated with L588A, M1145A and Y1436A  
223 mutants (**Fig. 3B**). By contrast, 2-APB activated W311A readily during application ( $87.1 \pm 60.2$   
224 % and  $143.3 \pm 92.5$  % of activation at +80 and -100 mV, respectively;  $n=9$ ; **Fig. 3B**). This  
225 stimulatory effect was even more pronounced post washout, with  $334.6 \pm 146.6$  % and  
226  $484.0 \pm 238.7$  % of activation measured at +80 and -100 mV, respectively. Taken together, these  
227 results suggest that these compounds access their putative binding site(s) via different lateral  
228 fenestrations, with phenytoin and 2-APB likely using the DII-DIII and DI-DIV fenestrations,  
229 respectively.

230

### 231 **Reintroduction of a bulky residue at the DI-DIV fenestration prevents 2-APB activation**

232 Our computational data suggest that the W311A mutation widens the DI-DIV fenestration (**Fig.**  
233 **1A**). If a wider DI-DIV fenestration was directly responsible for the 2-APB activation observed  
234 at W311A and AAAA, we hypothesised that reintroducing a bulky residue at the DI-DIV  
235 interface of the W311A mutant should prevent 2-APB entry and activation. For this purpose,  
236 we generated two new mutants W311F and W311A/L1439W. These mutants had narrower  
237 predicted tunnels at the DI-DIV interface (bottleneck radii of 1.3 and 1.6 Å for W311F and  
238 W311A/L1439W, respectively; **Fig. S2**). Like W311A, both mutants showed reduced current  
239 amplitudes compared to WT, suggesting that tryptophan at position 311 plays a critical role for  
240 channel function as even a subtle tryptophan-to-phenylalanine substitution was not well  
241 tolerated. The application and subsequent removal of 2-APB, however, did not result in current  
242 activation at these mutants (**Fig. 3B**), supporting our speculation that 2-APB is able to enter  
243 and bind to a previously inaccessible activation site only when we unplugged the DI-DIV  
244 fenestration with the W311A mutation.

245



## 246 **Inhibition masks activation during 2-APB application**

247 We were interested in the activation effect of 2-APB at W311A and AAAA channels, but our  
248 standard recording protocol did not determine the reversibility and time-course of the activation  
249 effect. To this end, we repeated the 2-APB experiments on the AAAA mutant but measured  
250 currents in two-minute intervals after the first washout to determine the time required for  
251 currents to return to baseline. We found that, despite the removal of 2-APB, the activating  
252 effect persisted, and it took as long as eight minutes for the current responses to gradually return  
253 to baseline (**Fig. 3C**, left panel). This sustained activation effect contrasts with the quick  
254 washout of the inhibitory effect observed with WT channels (**Fig. 2A**) and indicates the  
255 potential existence of an intramembrane activation site for 2-APB. In a separate experiment,  
256 we reapplied 2-APB for 30 seconds immediately after the two-minute washout period, and  
257 observed the activated current returned to baseline levels (**Fig. 3C**, right panel). These data  
258 suggest that inhibition and activation occurred simultaneously during 2-APB perfusion, and  
259 that the weakened inhibition and occasional slight activation observed following application of  
260 2-APB at W311A and AAAA channels was a net result of the two opposing effects (**Fig. 2A**  
261 **and 3B**).

262

## 263 **Effects of different 2-APB analogues on NALCN currents**

264 Owing to the ability of 2-APB to form a nitrogen-to-boron coordinate covalent bond, the  
265 molecule can exist in different forms including a ring form, an open chain form or a dimeric  
266 form (**Fig. 4A**) (39). Our data already showed that phenytoin, a structural analogue of the ring  
267 form, did not have any effect on NALCN current even when applied at concentration as high  
268 as 300  $\mu\text{M}$  (**Fig. 2 and 4B**). Considering the ability of 2-APB to switch between its different  
269 forms, we investigated which form(s) of 2-APB were responsible for the inhibition of WT  
270 currents. We therefore tested the effects of two 2-APB analogues on WT channels. The  
271 antihistamine diphenhydramine resembles the open chain form of 2-APB (**Fig. 4A**). At 1 mM,  
272 diphenhydramine inhibited the outward current ( $60.3 \pm 4.3$  % of inhibition at +80 mV;  $n=9$ ; **Fig.**  
273 **4B**) and activated the inward current ( $84.9 \pm 19.8$  % of activation at -100 mV;  $n=9$ ; **Fig.4B**).  
274 The dimeric analogue diphenylboronic anhydride (DPBA), on the other hand, inhibited  
275 NALCN current in both directions with higher efficacy than 2-APB at 1 mM ( $66.9 \pm 4.0$  % and  
276  $79 \pm 6.1$  % of inhibition at +80 and -100 mV, respectively;  $n=7$ ;  $p < 0.0001$ ; one-way ANOVA,  
277 Dunnett's test (compared to 2-APB); **Fig. 4B**).

278

## 279 **Functional screening of compounds containing the diphenylmethane/amine motif**

280 Up until this point, we found only three small molecules that have strong inhibitory effect on  
281 WT channel, namely L-703,606, 2-APB and DPBA (~70–80 % of inward current inhibition at  
282 -100 mV; **Fig. 2B and 4B**). However, none of these compounds had potency comparable to  
283 that of the trivalent cation  $Gd^{3+}$ . Since a common feature of these compounds is the diphenyl-  
284 x (x=carbon/boron) motif, we tested if other small molecule drugs with similar feature also  
285 modulate NALCN function. For this purpose, we tested nine compounds that have the  
286 diphenylmethane/amine motif including antihistamines (hydroxyzine, cetirizine, lomerizine  
287 and promethazine), antidepressants (citalopram), cognitive-enhancing drugs (linopirdine),  
288 anticancers ((E/Z)-endoxifen), statins (fluvastatin) and pharmacological tools (ICA-121431, a  
289 potent blocker of Nav1.1 and Nav1.3). We found that three compounds (lomerizine, ICA-  
290 121431 and linopirdine) had little to no effect on NALCN when applied at 100  $\mu$ M (**Fig. 4D**),  
291 three (hydroxyzine, promethazine and citalopram) had a stronger inhibitory effect on the  
292 outward than inward current, two (cetirizine and (E/Z)-endoxifen) inhibited both outward and  
293 inward currents, and one (fluvastatin) had no effect on the outward current, but inhibited the  
294 inward current efficaciously. These data suggest that the diphenyl-x (x=carbon/boron/nitrogen)  
295 motif may be a promising starting point for future structure-activity relationship studies.

296

## 297 **Discussion**

298 In 1977, in an attempt to explain the ability of neutral local anaesthetics to inhibit Navs even  
299 when the intracellular gate is closed, Hille proposed that there are alternative hydrophobic  
300 pathways in the membrane for lipid-soluble blockers to “come and go from the receptor” (40).  
301 The existence of such pathways has since been overwhelmingly supported by functional,  
302 structural and computational studies (26, 29, 33, 41-44). In eukaryotic Navs and Cavs, four  
303 lateral fenestrations that extend from the cell membrane to the inner pore exist at the interfaces  
304 between the S5 and S6 helices of neighbouring PDs (DI-DIV, DI-DII, DII-DIII and DIII-DIV;  
305 **Fig. S1A**) (45). These fenestrations are hydrophobic in nature and the physical dimensions of  
306 each fenestration are unique and dynamic, as they change depending on the functional state of  
307 the channel and the presence of lipids or inhibitors (44, 46-48). Functionally, these side  
308 passages serve both as routes for lipids and lipophilic molecules to enter or leave the central

309 cavity and as allosteric binding sites. Additionally, they are potential sites for drug-drug  
310 interactions, as exemplified by the concomitant use of the antiarrhythmic agent amiodarone  
311 and the antiviral sofosbuvir. Amiodarone inhibits Cav function by binding to the DIII-DIV  
312 fenestrations of the Cav1 subfamily members, but its binding unexpectedly helps anchor the  
313 binding of sofosbuvir in the central cavity, leading to synergistic pore block and fatal heartbeat  
314 slowing (49). There is also increasing appreciation for the pathophysiological relevance of  
315 lateral fenestrations following reports of disease mutations identified in this region of Navs  
316 (45). These mutations not only affect intrinsic channel function, but also alter the physical  
317 and/or chemical nature of these fenestrations, which may in turn affect drug accessibility via  
318 these routes. Hence, a detailed understanding of the properties and druggability of these often-  
319 overlooked side passages will help elucidate their roles in diseases and their potential  
320 exploitation in clinical or medical settings.

321

## 322 **Potential drug binding sites in and beyond the plugged lateral fenestrations of NALCN**

323 Thus far, all six available structures of NALCN indicate a lack of accessible lateral  
324 fenestrations, which is evident from their narrow bottleneck radii and the absence of resolved  
325 lipid molecule densities in this region (21, 22, 35-38). Given that lateral fenestrations contribute  
326 immensely to the pharmacology of the four-domain voltage-gated cation channel family, we  
327 hypothesised that the lack of lateral fenestrations may contribute to the pharmacological  
328 resistance of NALCN. Here, we demonstrate that substituting key bulky bottleneck residues  
329 that block these fenestrations in NALCN with alanine, which possesses a smaller side chain,  
330 renders the mutant channels sensitive to pharmacological effects not observed with WT  
331 channels. A particularly striking example is phenytoin, which clearly inhibits inward currents  
332 of AAAA channels, but has negligible activity on WT channels (**Fig. 2A and B**). On the other  
333 hand, 2-APB inhibits both WT and AAAA channels, but is also able to activate AAAA  
334 channels simultaneously. These data are consistent with our hypothesis: plugged lateral  
335 fenestrations contribute to the pharmacological resistance of NALCN, and freeing up these  
336 blocked routes allows drug entry, resulting in new pharmacological effects. An enticing  
337 implication of these results is that there are potential drug binding sites in and beyond the  
338 plugged lateral fenestrations of NALCN that are inaccessible in WT channels. We believe this  
339 is plausible for two reasons: first, NALCN has a central cavity of sufficient volume to  
340 accommodate Nav and Cav ligands that bind in this region (22), and second, while the overall  
341 degree of sequence conservation between NALCN and other members in the same superfamily

342 is low, some residues implicated in drug binding within the central cavity of Navs and Cavs  
343 are conserved in NALCN (e.g., Y1365 and A1369 on S6-DIV of Cav1.1 important for  
344 verapamil and diltiazem binding; **Fig. S2**). Taken together, our data suggest that the plugged  
345 lateral fenestrations in NALCN contribute to its pharmacological resistance, potentially by  
346 guarding druggable sites in the central cavity.

347

### 348 **Phenytoin and 2-APB exert their unique effects via different fenestrations**

349 There are now multiple lines of evidence in support of the idea that drugs access their  
350 intramembrane binding sites in Navs and Cavs in a domain interface-dependent manner (**Fig.**  
351 **S1A**). Various clinical and pharmacological compounds have been detected in specific  
352 individual fenestrations of Nav and Cav cryo-EM structures (e.g., bulleyaconitine A: DI-DII of  
353 Nav1.3; flecainide: DII-DIII of Nav1.5; nifedipine: DIII-DIV of Cav1.1; A-803467: DI-DIV  
354 of Nav1.8; **Fig. S1A**) (27, 28, 50, 51). Although compound concentrations used in sample  
355 preparation can go up to several hundred-fold higher than their potencies, these findings  
356 indicate the specificity of the interactions between compounds and individual fenestrations.  
357 Metadynamics simulations performed on Nav structures concur with structural studies by  
358 demonstrating that the local anaesthetic lidocaine prefers to pass through the DI-DII  
359 fenestration to achieve its pore-blocking effect (42). To determine if phenytoin and 2-APB  
360 have preferred entry route(s) at the AAAA mutant, we tested the effects of both compounds at  
361 single alanine mutant channels that have only one fenestration unplugged at a time. Our results  
362 show that phenytoin selectively inhibits the single M1145A mutant (**Fig. 3A**), whereas 2-APB  
363 selectively activates the single W311A mutant (**Fig. 3B**). These findings are in line with  
364 phenytoin and 2-APB favouring the DII-DIII and DI-DIV fenestrations, respectively, which  
365 are the widest fenestrations based on our *in silico* predictions (**Fig. 1A**).

366

### 367 **The existence of two distinct binding site(s) for 2-APB at AAAA channels**

368 The synthetic compound 2-APB is a membrane-permeable, multi-target modulator that inhibits  
369 inositol 1,4,5-trisphosphate (IP3) receptors (52), activates two-pore potassium (K2P) channels  
370 (53), and inhibits/activates Ca<sup>2+</sup> release-activated Ca<sup>2+</sup> (CRAC) channels (54) and different  
371 members of the Transient Receptor Potential (TRP) channel family (55). We have previously  
372 reported 2-APB as a low-potency inhibitor of NALCN (22). In this study, we also find that 2-  
373 APB activates NALCN efficaciously when the DI-DIV fenestration is unplugged (**Fig. 2A and**

374 **3B**). To explain our functional data, we propose a two-site model for 2-APB in which the  
375 inhibitory binding site(s) are found on the extracellular side of NALCN, whereas the activation  
376 site(s) are in the DI-DIV lateral fenestration (**Fig. 3D**). During 2-APB application, the  
377 compound binds simultaneously to the inhibitory and activation sites at the AAAA or W311A  
378 mutant, providing an explanation for the masked activation effect of 2-APB during drug  
379 application. Next, following drug removal with a two-minute buffer washout, 2-APB leaves  
380 the extracellular inhibitory site rapidly. However, 2-APB stays bound at the activation site due  
381 to the lipophilicity of both compound and fenestration, rationalising the prominent and long-  
382 lasting agonist response after washout (**Fig. 3C**). In support of this model, reintroduction of a  
383 bulky residue in the DI-DIV lateral portal (as in the case of W311F and W311A/L1439W  
384 mutants) prevents 2-APB activation (**Fig. 3B**), likely by blocking 2-APB entry into the DI-  
385 DIV fenestration. It is worth noting that the existence of multiple 2-APB binding sites, both in  
386 the extracellular and intramembrane space, have been found on members of the TRP channel  
387 family, which share similar channel architecture as Navs, Cavs and NALCN (55). While these  
388 findings are not direct evidence in support of our two-site model at NALCN, the ability of 2-  
389 APB to access spatially distinct sites is not unexpected given its promiscuity and membrane  
390 permeability.

391

### 392 **Physiological implications**

393 Our study has illustrated that there is potential pharmacology to be exploited beyond the  
394 occluded fenestrations of NALCN. While we have achieved this artificially by reducing the  
395 side-chain volume of key bottleneck residues with alanine substitutions, it is possible that the  
396 fenestration-plugging residues may adopt different conformations, which in turn could alter the  
397 radii and accessibility of these fenestrations. In fact, there is structural evidence supported by  
398 molecular dynamics (MD) simulations that key aromatic residues along lateral fenestrations of  
399 prokaryotic and eukaryotic Navs are mobile and their distinct rotamer conformations can  
400 directly gate the fenestration openings. For instance, the highly conserved phenylalanine  
401 residue in the middle of S6-DI (position 15) of Nav<sub>v</sub>1.7 (absolutely conserved in all Navs and  
402 Cavs; corresponds to W311 of NALCN; **Fig. S2**) can adopt a downward or an upward  
403 configuration (when viewed from the side of the membrane), depending on local  
404 conformational changes in the PDs (**Fig. S3B**) (44, 56). As such, the side chain movements of  
405 this critical phenylalanine residue will widen (downward) or narrow (upward) the bottleneck  
406 radius of the DI-DIV fenestration of Nav<sub>v</sub>1.7. In agreement with these observations, MD

407 simulations consistently identify this phenylalanine as a key bottleneck residue across different  
408 Nav subtypes, and the mobility of these residues can have dramatic effect on fenestration  
409 dimensions (42). Therefore, although static snapshots of NALCN structures show that the  
410 lateral fenestrations at all domain interfaces are sealed by bulky residues adopting an upward  
411 configuration (**Fig. S3A**), it is conceivable that these residues can transition to a downward  
412 position and open individual fenestrations sporadically under specific conditions. Some  
413 possibilities include ligand binding or oscillation between distinct functional states (which are  
414 yet unclear for NALCN) that would expectedly trigger local conformational changes in the  
415 PDs.

416

417 The possibility of disease mutations affecting fenestration dimensions of NALCN should also  
418 be considered when interpreting our mutational data. Out of the <50 *de novo* NALCN missense  
419 mutations reported to date, there are at least two (T513N of S5-DII and F1141V of S6-DIII)  
420 that occur at residues lining the lateral fenestrations of NALCN (**Fig. 1A**). These mutations are  
421 found in the DII-DIII fenestration of NALCN and given the close vicinity of F1141 to the key  
422 bottleneck residue M1145, we expect the Phe-to-Val substitution would enlarge the  
423 fenestration portal. However, predicted tunnels through the DII-DIII interface of either T513N  
424 or F1141V are not dissimilar to that of WT, as L591 and M1145 are still restricting access (**Fig.**  
425 **S3C**). Nonetheless, it is worth noting that mutations of many adjacent residues including but  
426 not limited to L312I/V, V313G, F512V, L590F, V595F and L1150V have been identified in  
427 CLIFAHDD patients. As many of these *de novo* variants have drastic impact on channel  
428 function (22), it is reasonable to expect that these mutations may alter fenestration dimensions  
429 by perturbing the conformational landscape. We have also searched for naturally occurring  
430 NALCN variants in the gnomAD database but did not find any mutations affecting key  
431 bottleneck residues, which may reflect a physiological requirement for these fenestration-  
432 defining residues to remain unchanged. This is conjecturally supported by our functional data  
433 that modifications in these fenestrations, for instance at position 311, can have dramatic impact  
434 on NALCN function and pharmacology (W311A/F; **Fig. 1B and 3B**). As the study of NALCN  
435 channelopathies is still a growing field, the pathophysiological relevance of these fenestrations  
436 will hopefully become clearer in the future when more patient data become available.

437

438

439

## 440 **Limitations and future directions**

441 The first limitation of this study is that our hypotheses are guided predominantly by the  
442 currently available structural information. We have identified and mutated four key residues  
443 that appear to plug individual lateral fenestrations based on cryo-EM structures of NALCN. As  
444 proteins are dynamic entities, these static snapshots of NALCN do not report on the dynamics  
445 of fenestration dimensions. A potential issue with this approach is that residues at positions  
446 other than W311, L588, M1145 and Y1436 may take over the role of key bottleneck residues  
447 over time under different functional states. It is therefore important for future studies to use  
448 equilibrium simulations to understand the motions of fenestration-lining residues and how their  
449 conformations regulate the radii of these fenestrations. In addition, it is important to examine  
450 if small molecules can pass through the lateral fenestrations and if there are potential binding  
451 sites within the fenestrations and central cavity of NALCN. Functional validation of residues  
452 identified from MD studies will improve our understanding of these intricate side passages that  
453 can serve as foundation to evaluate their druggability in the future. The determination of open-  
454 state or gain/loss-of-function disease mutant structures of NALCN may provide further insights  
455 into the conformational flexibility of key bottleneck residues.

456  
457 The second limitation lies in the small panel of 24 compounds screened on NALCN currents.  
458 While we identified compounds such as DPBA and fluvastatin as novel efficacious inhibitors  
459 of inward current of NALCN, their minimal effective concentrations are too high (100  $\mu$ M to  
460 1 mM) for them to be considered NALCN-specific blockers. To establish a clear structure-  
461 activity relationship, it is necessary to perform high-throughput screening to gather sufficient  
462 data. However, the constitutive activity of NALCN and its absolute requirement for three  
463 auxiliary subunits to function impose significant technical barriers at every step of this process,  
464 from the generation of stable cell lines to distinguishing NALCN-mediated current from non-  
465 specific leak during electrophysiological experiments. An alternative approach is to synthesise  
466 and characterise a library of structural analogues of hit compounds from our work here (2-  
467 APB, DPBA, (E/Z)-endoxifen and fluvastatin) and other studies (e.g., L-703,606) (57). Finally,  
468 considering the remarkable resistance of NALCN to pharmacological modulation, combining  
469 computer-aided drug design with artificial intelligence may help to explore a vast chemical  
470 space to find novel, potent and specific NALCN blockers.

471

472 **Concluding remarks**

473 There has been enormous progress in our understanding of NALCN channelosome structure  
474 and function in the last few years, but the scarcity of NALCN-specific pharmacological tools  
475 remains a significant challenge in the field. Delineating the mechanisms underlying this  
476 pharmacological resistance is therefore crucial to unlocking NALCN's potential as a  
477 pharmacological and therapeutic target. In this study, we have explored the hypothesis that  
478 occluded lateral fenestrations contribute to pharmacological resistance of NALCN and our  
479 findings suggest that key bottleneck residues in this region deter drug accessibility. Despite the  
480 identification of new NALCN blockers, the low potencies of these compounds reiterate the  
481 difficulty in targeting this leak channel. Perhaps, exploring alternative strategies focusing on  
482 auxiliary subunits (UNC79, UNC80 and FAM155A) of the channelosome in the future may  
483 help overcome the present paucity in NALCN-specific modulators.

484

485

486

487

488

489

490

491

492

493

494

495

496

497

498



## 499 Figure legends

500 **Figure 1. Unplugging lateral fenestrations of NALCN by substituting key bottleneck**  
501 **residues with alanine.** (A) Predicted tunnels at (1) DI-DIV, (2) DI-DII, (3) DII-DIII and (4)  
502 DIII-DIV interfaces of NALCN WT (*left*) and AAAA (*right*) channels (top view). Key  
503 bottleneck and fenestration-lining residues are labelled. The bottleneck radius values for all  
504 detected tunnels are indicated accordingly. No predicted tunnels were found at the DIII-DIV  
505 interface of WT. (B) Representative current traces from *Xenopus laevis* oocytes expressing  
506 WT, AAAA or single alanine mutant complexes (+UNC79, UNC80 and FAM155A) in  
507 response to step protocols from +80 to -100 mV (holding potential, HP=0 mV) in Ca<sup>2+</sup>- and  
508 Mg<sup>2+</sup>-free buffer. (C) The plot shows current amplitudes elicited at +80 and -80 mV for all  
509 tested constructs. \*\*\*\**p*< 0.0001 using one-way ANOVA, Dunnett's test (against WT). Dotted  
510 lines indicate the minimum and maximum current values of WT.

511

512 **Figure 2. Effects of Nav, Cav and NALCN inhibitors at NALCN WT and AAAA channels.**  
513 (A) Representative current traces from *Xenopus laevis* oocytes expressing WT or AAAA  
514 channel complexes (+UNC79, UNC80 and FAM155A) during control (black), compound  
515 application (red) and washout (blue) at +80 (outward) and -100 mV (inward) from a HP of 0  
516 mV. (B) The plots show efficacy of different compounds at WT and AAAA channels during  
517 application (red) and washout (blue) normalised against control current at +80 mV (top) and -  
518 100 mV (bottom). \*\*\*\**p*< 0.0001 using unpaired t-test.

519

520 **Figure 3. Effects of phenytoin and 2-APB at single alanine NALCN mutants.** (A–B) *Left*,  
521 representative current traces from *Xenopus laevis* oocytes showing the effects of 300 μM  
522 phenytoin (A) and 1 mM 2-APB (B) at various mutant channels in response to step protocols  
523 from +80 (outward) and -100 mV (inward) from a HP of 0 mV. *Right*, the plot shows  
524 percentage of current left during the application of phenytoin (A) or after the washout of 2-  
525 APB (B), normalised against control current elicited at -100 mV. (C) Representative current  
526 traces from *Xenopus laevis* oocytes expressing the AAAA mutant in response to application of  
527 1 mM 2-APB using two protocols: *left*, single application of 2-APB (2) and currents measured  
528 at a 2-min interval for 8 min (3–6) during washout; *right*, 2-APB applied twice, before (2) and  
529 after (4) a single 2-min washout step (3). (D) Schematic of our proposed two-site model for 2-  
530 APB at NALCN channels containing the W311A mutation. \*\*\*\**p*< 0.0001 using one-way  
531 ANOVA, Dunnett's test (against WT).

532

533 **Figure 4. Effects of 2-APB analogues and compounds containing the**  
534 **diphenylmethane/amine motif at NALCN WT channels.** (A) Different forms of 2-APB (*top*)  
535 and their corresponding structural analogues (*bottom*). (B) *Top*, representative current traces  
536 from *Xenopus laevis* oocytes expressing NALCN WT channel complex (+UNC79, UNC80 and  
537 FAM155A) in response to 1 mM 2-APB, 1 mM diphenhydramine (DPH), 300 μM phenytoin  
538 or 1 mM diphenylborinic anhydride (DPBA) at +80 mV (outward) and -100 mV (inward).  
539 *Bottom*, the plot shows percentage of current left during the application of 2-APB, DPH,  
540 phenytoin and DPBA. (C) Chemical structures of compounds containing the  
541 diphenylmethane/amine motif. (D) *Left*, representative current traces from *Xenopus laevis*  
542 oocytes expressing NALCN WT channel complex in response to different compounds (see  
543 Methods for concentrations tested). *Right*, the plots show efficacy of different compounds at

544 WT NALCN channels during application (red) and washout (blue) normalised against control  
545 current at +80 mV (top) and -100 mV (bottom).

546

547 **Figure S1.** (A) Top view of Nav and Cav cryo-EM structures bound to blockers and  
548 phospholipids. (B) Side view of the NALCN channelosome structure. (C) Predicted lateral  
549 fenestrations of apo-Nav1.5 (*top*) and apo-Cav3.3 (*bottom*) channels (top view). Bottleneck  
550 radii of individual predicted tunnels are indicated accordingly.

551

552 **Figure S2. Sequence alignment of the pore segments of human NALCN, Nav and Cav**  
553 **channels.** The residues involved in the binding and function of various compounds are shaded  
554 in different colours.

555

556 **Figure S3.** (A) Cartoon showing the upward configuration of key bottleneck residues in the  
557 lateral fenestrations of NALCN (side view). (B) Cartoon showing the flexible conformations  
558 of a highly conserved phenylalanine residue (F391) in S6-DI of Nav1.7 (side view). F391  
559 appears to adopt a downward configuration in the structure of Nav1.7 WT in the absence of  
560 bound ligands (PDB 7W9K) and an upward configuration in the presence of the Nav1.7 blocker  
561 XEN907 (PDB 7XM9). (C) Predicted tunnels at DII-DIII interface of NALCN T513N (*left*)  
562 and F1141V (*right*) channels (top view). Key bottleneck and fenestration-lining residues are  
563 labelled. The bottleneck radius values are indicated accordingly.

564

565

566

567

568

569

570

571

572

573

574

575

576

## 577 **Materials and methods**

### 578 **Tunnel detection using MOLE 2.5**

579 To prepare the WT channel structure for tunnel detection, we first removed the auxiliary  
580 subunits UNC79, UNC80, FAM155A and CaM from the channelosome structure (PDB 7SX3).  
581 We then used MOLE 2.5 (<https://mole.upol.cz/>) to detect tunnels in the structure of WT channel  
582 with default parameters as follows: minimal bottleneck radius 1.2 Å, probe radius 3 Å, surface  
583 cover radius 10 Å and origin radius 5 Å. We filtered out irrelevant tunnels that did not run  
584 parallel to the cell membrane and did not start from the central cavity. We used PyMOL to  
585 perform *in silico* mutagenesis on NALCN, and subjected mutant structures to the same  
586 procedure to detect lateral fenestrations.

587

### 588 **Molecular biology**

589 We cloned the human NALCN, UNC79, UNC80 and FAM155A complementary DNAs  
590 (cDNAs) between HindIII and XhoI sites in a modified pCDNA3.1(+) vector containing a 3'-  
591 *Xenopus* globin untranslated region and a polyadenylation signal. These constructs were  
592 generated using custom gene synthesis with codon optimization for *Homo sapiens* (GeneArt,  
593 Thermo Fisher Scientific). We generated all NALCN mutants using custom-designed primers  
594 (Eurofins Genomics or Merck) and PfuUltra II Fusion HS DNA Polymerase (Agilent  
595 Technologies) or the Q5 Site-Directed Mutagenesis Kit (New England Biolabs). We verified  
596 the sequences of plasmid DNAs purified from transformed *E. coli* by Sanger DNA sequencing  
597 (Eurofins Genomics). For expression in *Xenopus laevis* oocytes, we linearised plasmid DNAs  
598 with XbaI restriction enzyme, from which capped mRNAs were synthesised using the T7  
599 mMessage mMachine Kit (Ambion).

600

### 601 **Two-electrode voltage clamp**

602 To surgically remove the ovarian lobes, adult female *X. laevis* were anaesthetized with 0.3%  
603 tricaine (under license 2014–15-0201–00031, approved by the Danish Veterinary and Food  
604 Administration). Frogs were housed and cared for by an animal facility approved by the  
605 University of Copenhagen. We then separated the ovarian lobes into smaller parts and  
606 defolliculated mechanically at 200 rpm at 37 °C. For injection, we sorted healthy-looking stage

607 V-VI oocytes. To prepare for injection, we diluted the mRNAs of NALCN (WT or mutant),  
608 UNC79, UNC80 and FAM115A to a concentration of 1000 ng/ $\mu$ L and then mixed in a ratio of  
609 1:1:1:1. Using the Nanoliter 2010 injector (World Precision Instruments), we injected 36.8 or  
610 41.4 nL of pre-mixed RNA into each oocyte. During injection, we lined up the oocytes in OR2  
611 medium (82.5 mM NaCl, 2 mM KCl, 1 mM MgCl<sub>2</sub>, 5 mM HEPES) and injected the oocytes  
612 at the equator region of the cell. For optimal expression, we then incubated the oocytes at 140  
613 rpm at 18 °C for 5 days in antibiotic medium (96 mM NaCl, 2 mM KCl, 1 mM MgCl<sub>2</sub>, 1.8  
614 mM CaCl<sub>2</sub>, 5 mM HEPES, 2.5 mM pyruvate, 0.5 mM theophylline, 50  $\mu$ g/mL gentamycin and  
615 tetracycline). We performed two-electrode-voltage clamp recordings using the OC-725C  
616 Oocyte Clamp amplifier (Warner Instrument Corp, USA). The microelectrodes (borosilicate  
617 glass capillaries, 1.2 mm OD, 0.94 mm ID, Harvard Apparatus) were pulled using the P-1000  
618 horizontal puller (Sutter Instruments) and filled with 3 M KCl and had a resistance between  
619 0.2-1.1 M $\Omega$ . Due to NALCN's sensitivity to the extracellular divalent cations Ca<sup>2+</sup> and Mg<sup>2+</sup>,  
620 the oocyte was constantly perfused with Ca<sup>2+</sup>- and Mg<sup>2+</sup>-free buffer that is substituted with  
621 Ba<sup>2+</sup> [96 mM NaCl, 2 mM KCl, 1.8 mM BaCl<sub>2</sub> and 5 mM HEPES (pH 7.4) with NaOH], called  
622 Ca<sup>2+</sup>/Mg<sup>2+</sup>-free ND96. We acquired the data using the pCLAMP 10 software (Molecular  
623 Devices and a Digidata 1550 digitizer (Molecular devices), sampled at 10 kHz. We filtered  
624 electrical powerline interference with a Hum Bug 50/60 Hz Noise Eliminator (Quest  
625 Scientific).

626

627 For the pharmacological screening, we dissolved each tested compound to a stock solution in  
628 either Ca<sup>2+</sup>/Mg<sup>2+</sup>-free ND96 or DMSO, according to their solubility. We then diluted the stock  
629 solution further in Ca<sup>2+</sup>/Mg<sup>2+</sup>-free ND96. For the compounds that were only soluble in DMSO,  
630 the final DMSO concentration was kept at 1% or less. Due to NALCN's pharmacological  
631 resistance, we tested the compounds at the highest concentrations that were possible while  
632 maintaining the DMSO limit.

633

634 Final concentrations of compounds tested: 1 mM 2-APB (Sigma-Aldrich), 300  $\mu$ M  
635 carbamazepine (VWR), 300  $\mu$ M CP96345 (Tocris Bioscience), 300  $\mu$ M diltiazem  
636 hydrochloride (Alomone Labs), 100  $\mu$ M L-703,606 oxalate salt hydrate (Sigma-Aldrich), 300  
637  $\mu$ M lacosamide (Sigma Aldrich), 300  $\mu$ M lamotrigine (Combi-Blocks), 300  $\mu$ M lidocaine  
638 hydrochloride monohydrate (Sigma-Aldrich), 300  $\mu$ M nifedipine (Alomone Labs), 300  $\mu$ M

639 phenytoin sodium (VWR), 300  $\mu$ M propafenone hydrochloride (Sigma-Aldrich), 300  $\mu$ M  
640 quinidine (Sigma-Aldrich), 300  $\mu$ M Z944 hydrochloride (Sigma-Aldrich), 1 mM  
641 diphenhydramine hydrochloride (Sigma-Aldrich), 1 mM diphenylborinic anhydride (DPBA;  
642 Sigma-Aldrich), 1 mM hydroxyzine dihydrochloride (Sigma-Aldrich), 1 mM cetirizine  
643 hydrochloride (Sigma-Aldrich), 100  $\mu$ M lomerizine dihydrochloride (Sigma-Aldrich), 1 mM  
644 promethazine hydrochloride (Sigma-Aldrich), 1 mM citalopram hydrobromide (Sigma-  
645 Aldrich), 100  $\mu$ M ICA-121431 (Sigma-Aldrich), 100  $\mu$ M linopirdine (Sigma-Aldrich), 100  $\mu$ M  
646 (E/Z)-endoxifen hydrochloride (Sigma-Aldrich) and 1 mM fluvastatin sodium (Sigma-  
647 Aldrich).

648

649 For the TEVC recordings, one oocyte (injected with either NALCN WT or mutant) was placed  
650 into the recording chamber with constant perfusion of  $\text{Ca}^{2+}/\text{Mg}^{2+}$ -free ND96. We then ran the  
651 first voltage protocol as a control and to check sufficient NALCN expression. Before testing  
652 compounds that were dissolved in a final DMSO concentration of 1%, we applied a  $\text{Ca}^{2+}/\text{Mg}^{2+}$ -  
653 free ND96 with 1 % DMSO control solution and ran the same voltage protocol to confirm that  
654 NALCN function was not affected by the DMSO content. Afterwards, we switched the  
655 perfusion in the recording chamber to the tested compound solution. To ensure that the oocyte  
656 was fully exposed to the compound, we perfused it with the compound solution for 30s and  
657 then ran the same voltage protocol again. To examine how long the effect of a compound lasted  
658 after it has been applied and washed-out, we switched the perfusion back to  $\text{Ca}^{2+}/\text{Mg}^{2+}$ -free  
659 ND96 and washed the oocyte for 2 min, followed by running the same protocol for a third time.  
660 To investigate the prolonged effect of 2-APB during wash-out, we continued constant perfusion  
661 with  $\text{Ca}^{2+}/\text{Mg}^{2+}$ -free ND96, running the same voltage protocol every 2 minutes.

662

### 663 **Data analysis**

664 We analysed the recorded currents using the Clampfit 10.7 software. The raw traces were  
665 filtered at 800 Hz (Gaussian low-pass filter) and representative current traces for illustration  
666 underwent data reduction with a reduction factor of 5. We performed statistical analysis using  
667 GrahPad Prism (Version 8.4, GraphPad Software), the specific statistical tests used are  
668 mentioned where relevant.

669

## 670 References

- 671 1. B. Lu *et al.*, The neuronal channel NALCN contributes resting sodium permeability and is  
672 required for normal respiratory rhythm. *Cell* **129**, 371-383 (2007).
- 673 2. H. A. Nash, R. L. Scott, B. C. Lear, R. Allada, An unusual cation channel mediates photic  
674 control of locomotion in *Drosophila*. *Curr Biol* **12**, 2152-2158 (2002).
- 675 3. E. Yeh *et al.*, A putative cation channel, NCA-1, and a novel protein, UNC-80, transmit  
676 neuronal activity in *C. elegans*. *PLoS Biol* **6**, e55 (2008).
- 677 4. L. Xie *et al.*, NLF-1 delivers a sodium leak channel to regulate neuronal excitability and  
678 modulate rhythmic locomotion. *Neuron* **77**, 1069-1082 (2013).
- 679 5. S. Gao *et al.*, The NCA sodium leak channel is required for persistent motor circuit activity that  
680 sustains locomotion. *Nat Commun* **6**, 6323 (2015).
- 681 6. O. Eigenbrod *et al.*, Rapid molecular evolution of pain insensitivity in multiple African rodents.  
682 *Science* **364**, 852-859 (2019).
- 683 7. B. C. Lear *et al.*, The ion channel narrow abdomen is critical for neural output of the *Drosophila*  
684 circadian pacemaker. *Neuron* **48**, 965-976 (2005).
- 685 8. M. Flourakis *et al.*, A conserved bicycle model for circadian clock control of membrane  
686 excitability. *Cell* **162**, 836-848 (2015).
- 687 9. E. P. Rahrman *et al.*, The NALCN channel regulates metastasis and nonmalignant cell  
688 dissemination. *Nat Genet* **54**, 1827-1838 (2022).
- 689 10. M. D. Al-Sayed *et al.*, Mutations in NALCN cause an autosomal-recessive syndrome with  
690 severe hypotonia, speech impairment, and cognitive delay. *Am J Hum Genet* **93**, 721-726  
691 (2013).
- 692 11. Ç. Köroğlu, M. Seven, A. Tolun, Recessive truncating NALCN mutation in infantile  
693 neuroaxonal dystrophy with facial dysmorphism. *J Med Genet* **50**, 515-520 (2013).
- 694 12. J. X. Chong *et al.*, *De novo* mutations in NALCN cause a syndrome characterized by congenital  
695 contractures of the limbs and face, hypotonia, and developmental delay. *Am J Hum Genet* **96**,  
696 462-473 (2015).
- 697 13. T. Takenouchi *et al.*, Biallelic mutations in NALCN: Expanding the genotypic and phenotypic  
698 spectra of IHPRF1. *Am J Med Genet A* **176**, 431-437 (2018).
- 699 14. N. C. Bramswig *et al.*, Genetic variants in components of the NALCN-UNC80-UNC79 ion  
700 channel complex cause a broad clinical phenotype (NALCN channelopathies). *Hum Genet* **137**,  
701 753-768 (2018).
- 702 15. J. H. Lee, L. L. Cribbs, E. Perez-Reyes, Cloning of a novel four repeat protein related to voltage-  
703 gated sodium and calcium channels. *FEBS Lett* **445**, 231-236 (1999).
- 704 16. L. A. Swayne *et al.*, The NALCN ion channel is activated by M3 muscarinic receptors in a  
705 pancreatic  $\beta$ -cell line. *EMBO Rep* **10**, 873-880 (2009).
- 706 17. A. N. Boone, A. Senatore, J. Chemin, A. Monteil, J. D. Spafford,  $Gd^{3+}$  and calcium sensitive,  
707 sodium leak currents are features of weak membrane-glass seals in patch clamp recordings.  
708 *PLoS One* **9**, e98808 (2014).
- 709 18. J. M. Egan, C. A. Peterson, W. M. Fry, Lack of current observed in HEK293 cells expressing  
710 NALCN channels. *Biochim Open* **6**, 24-28 (2018).
- 711 19. H. C. Chua, M. Wulf, C. Weidling, L. P. Rasmussen, S. A. Pless, The NALCN channel complex  
712 is voltage sensitive and directly modulated by extracellular calcium. *Sci Adv* **6**, eaaz3154  
713 (2020).
- 714 20. M. Bouasse, H. Impheng, Z. Servant, P. Lory, A. Monteil, Functional expression of  
715 CLIFAHDD and IHPRF pathogenic variants of the NALCN channel in neuronal cells reveals  
716 both gain- and loss-of-function properties. *Sci Rep* **9**, 11791 (2019).
- 717 21. M. Kschonsak *et al.*, Structural architecture of the human NALCN channelosome. *Nature* **603**,  
718 180-186 (2022).
- 719 22. M. Kschonsak *et al.*, Structure of the human sodium leak channel NALCN. *Nature* **587**, 313-  
720 318 (2020).
- 721 23. G. Wisedchaisri, T. M. Gamal El-Din, Druggability of voltage-gated sodium channels -  
722 Exploring old and new drug receptor sites. *Front Pharmacol* **13**, 858348 (2022).

- 723 24. W. A. Catterall, M. J. Lenaeus, T. M. Gamal El-Din, Structure and pharmacology of voltage-  
724 gated sodium and calcium channels. *Annu Rev Pharmacol Toxicol* **60**, 133-154 (2020).
- 725 25. D. Jiang, J. Zhang, Z. Xia, Structural advances in voltage-gated sodium channels. *Front*  
726 *Pharmacol* **13**, 908867 (2022).
- 727 26. T. M. Gamal El-Din, M. J. Lenaeus, N. Zheng, W. A. Catterall, Fenestrations control resting-  
728 state block of a voltage-gated sodium channel. *Proc Natl Acad Sci U S A* **115**, 13111-13116  
729 (2018).
- 730 27. D. Jiang *et al.*, Structure of the cardiac sodium channel. *Cell* **180**, 122-134.e110 (2020).
- 731 28. Y. Zhao *et al.*, Molecular basis for ligand modulation of a mammalian voltage-gated Ca<sup>2+</sup>  
732 channel. *Cell* **177**, 1495-1506.e1412 (2019).
- 733 29. L. He *et al.*, Structure, gating, and pharmacology of human Cav3.3 channel. *Nat Commun* **13**,  
734 2084 (2022).
- 735 30. X. Yao, S. Gao, N. Yan, Structural basis for pore blockade of human voltage-gated calcium  
736 channel Cav1.3 by motion sickness drug cinnarizine. *Cell Res* **32**, 946-948 (2022).
- 737 31. S. Gao, N. Yan, Structural basis of the modulation of the voltage-gated calcium ion channel  
738 Cav1.1 by dihydropyridine compounds. *Angew Chem Int Ed Engl* **60**, 3131-3137 (2021).
- 739 32. Y. Zhao *et al.*, Cryo-EM structures of apo and antagonist-bound human Cav3.1. *Nature* **576**,  
740 492-497 (2019).
- 741 33. X. Pan *et al.*, Structure of the human voltage-gated sodium channel Nav1.4 in complex with  
742  $\beta$ 1. *Science* **362** (2018).
- 743 34. C. L. Noland *et al.*, Structure-guided unlocking of Na<sub>x</sub> reveals a non-selective tetrodotoxin-  
744 insensitive cation channel. *Nat Commun* **13**, 1416 (2022).
- 745 35. J. Xie *et al.*, Structure of the human sodium leak channel NALCN in complex with FAM155A.  
746 *Nat Commun* **11**, 5831 (2020).
- 747 36. Y. Kang, J. X. Wu, L. Chen, Structure of voltage-modulated sodium-selective NALCN-  
748 FAM155A channel complex. *Nat Commun* **11**, 6199 (2020).
- 749 37. L. Zhou, H. Liu, Q. Zhao, J. Wu, Z. Yan, Architecture of the human NALCN channelosome.  
750 *Cell Discov* **8**, 33 (2022).
- 751 38. Y. Kang, L. Chen, Structure and mechanism of NALCN-FAM155A-UNC79-UNC80 channel  
752 complex. *Nat Commun* **13**, 2639 (2022).
- 753 39. C. K. Colton, M. X. Zhu, 2-Aminoethoxydiphenyl borate as a common activator of TRPV1,  
754 TRPV2, and TRPV3 channels. *Handb Exp Pharmacol* 10.1007/978-3-540-34891-7\_10, 173-  
755 187 (2007).
- 756 40. B. Hille, Local anesthetics: hydrophilic and hydrophobic pathways for the drug-receptor  
757 reaction. *J Gen Physiol* **69**, 497-515 (1977).
- 758 41. M. R. Ghovanloo *et al.*, Cannabidiol inhibits the skeletal muscle Nav1.4 by blocking its pore  
759 and by altering membrane elasticity. *J Gen Physiol* **153** (2021).
- 760 42. E. Tao, B. Corry, Characterizing fenestration size in sodium channel subtypes and their  
761 accessibility to inhibitors. *Biophys J* **121**, 193-206 (2022).
- 762 43. C. Boiteux *et al.*, Local anesthetic and antiepileptic drug access and binding to a bacterial  
763 voltage-gated sodium channel. *Proc Natl Acad Sci U S A* **111**, 13057-13062 (2014).
- 764 44. G. Huang *et al.*, High-resolution structures of human Nav1.7 reveal gating modulation through  
765  $\alpha$ - $\pi$  helical transition of S6(IV). *Cell Rep* **39**, 110735 (2022).
- 766 45. T. M. Gamal El-Din, M. J. Lenaeus, Fenestropathy of voltage-gated sodium channels. *Front*  
767 *Pharmacol* **13**, 842645 (2022).
- 768 46. D. Jiang *et al.*, Open-state structure and pore gating mechanism of the cardiac sodium channel.  
769 *Cell* **184**, 5151-5162.e5111 (2021).
- 770 47. J. Payandeh, T. M. Gamal El-Din, T. Scheuer, N. Zheng, W. A. Catterall, Crystal structure of  
771 a voltage-gated sodium channel in two potentially inactivated states. *Nature* **486**, 135-139  
772 (2012).
- 773 48. W. A. Catterall, G. Wisedchaisri, N. Zheng, The conformational cycle of a prototypical voltage-  
774 gated sodium channel. *Nat Chem Biol* **16**, 1314-1320 (2020).
- 775 49. X. Yao *et al.*, Structural basis for the severe adverse interaction of sofosbuvir and amiodarone  
776 on L-type Cav channels. *Cell* **185**, 4801-4810.e4813 (2022).

- 777 50. X. Li *et al.*, Structural basis for modulation of human Nav1.3 by clinical drug and selective  
778 antagonist. *Nat Commun* **13**, 1286 (2022).
- 779 51. X. Huang *et al.*, Structural basis for high-voltage activation and subtype-specific inhibition of  
780 human Nav1.8. *Proc Natl Acad Sci U S A* **119**, e2208211119 (2022).
- 781 52. T. Maruyama, T. Kanaji, S. Nakade, T. Kanno, K. Mikoshiba, 2APB, 2-aminoethoxydiphenyl  
782 borate, a membrane-penetrable modulator of Ins(1,4,5)P<sub>3</sub>-induced Ca<sup>2+</sup> release. *J Biochem* **122**,  
783 498-505 (1997).
- 784 53. L. Beltrán, M. Beltrán, A. Aguado, G. Gisselmann, H. Hatt, 2-Aminoethoxydiphenyl borate  
785 activates the mechanically gated human KCNK channels KCNK 2 (TREK-1), KCNK 4  
786 (TRAAK), and KCNK 10 (TREK-2). *Front Pharmacol* **4**, 63 (2013).
- 787 54. M. Prakriya, R. S. Lewis, Potentiation and inhibition of Ca<sup>2+</sup> release-activated Ca<sup>2+</sup> channels  
788 by 2-aminoethoxydiphenyl borate (2-APB) occurs independently of IP<sub>3</sub> receptors. *J Physiol* **536**,  
789 3-19 (2001).
- 790 55. M. V. Yelshanskaya, A. I. Sobolevsky, Ligand-binding sites in vanilloid-subtype TRP  
791 channels. *Front Pharmacol* **13**, 900623 (2022).
- 792 56. H. Shen, D. Liu, K. Wu, J. Lei, N. Yan, Structures of human Nav1.7 channel in complex with  
793 auxiliary subunits and animal toxins. *Science* **363**, 1303-1308 (2019).
- 794 57. S. Hahn, S. W. Kim, K. B. Um, H. J. Kim, M. K. Park, N-benzhydryl quinuclidine compounds  
795 are a potent and Src kinase-independent inhibitor of NALCN channels. *Br J Pharmacol* **177**,  
796 3795-3810 (2020).
- 797



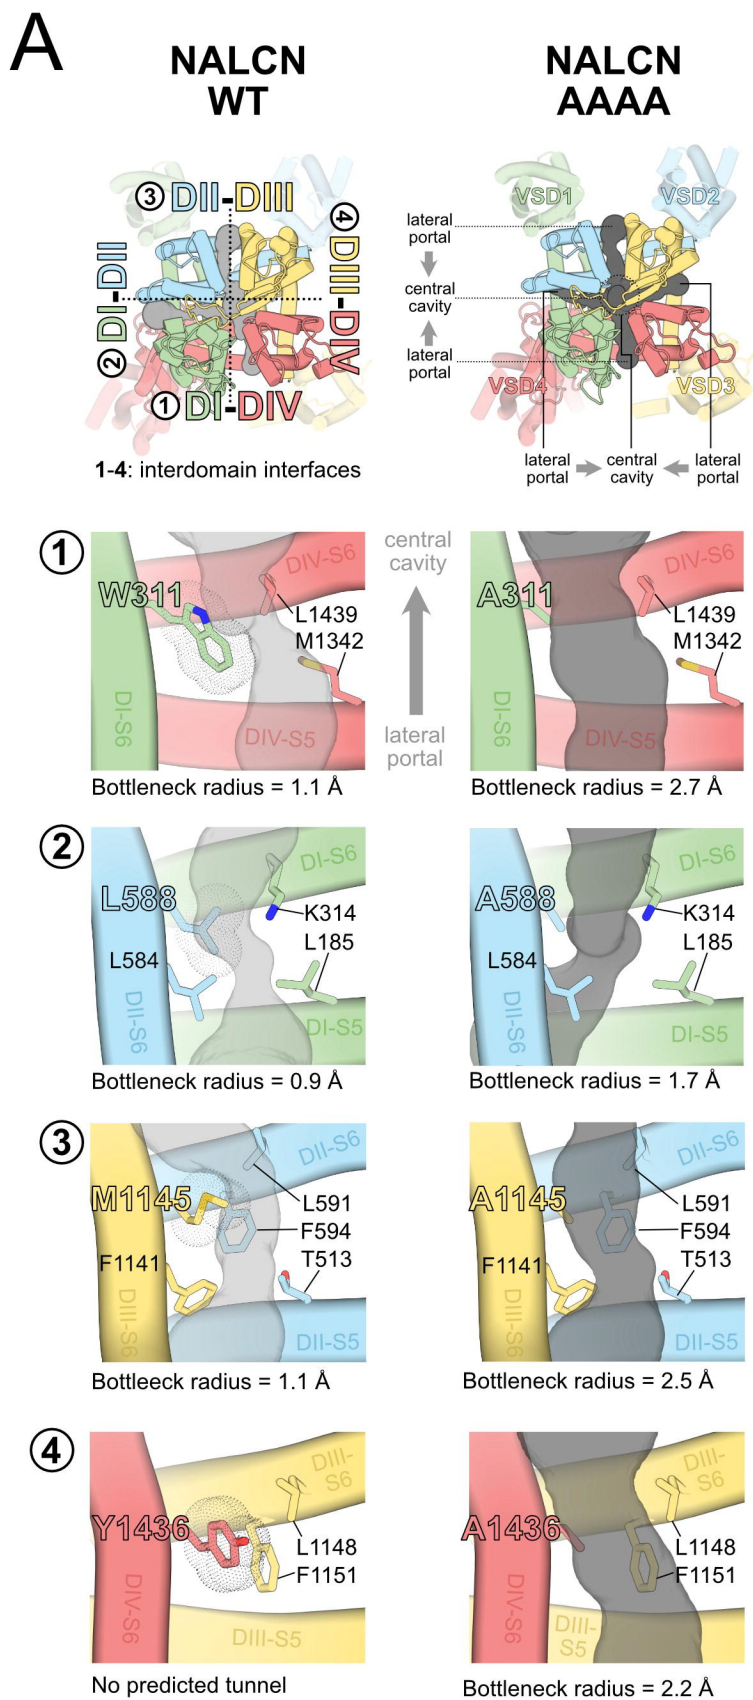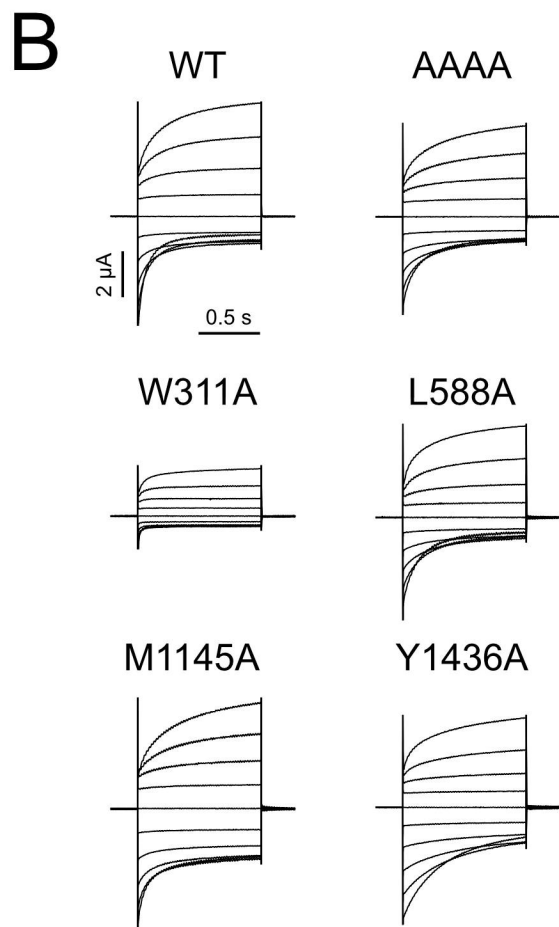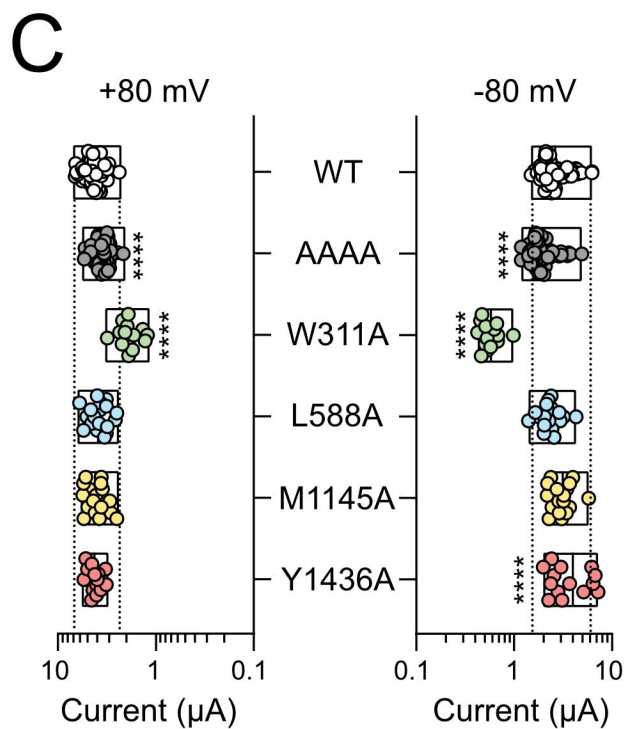

**A**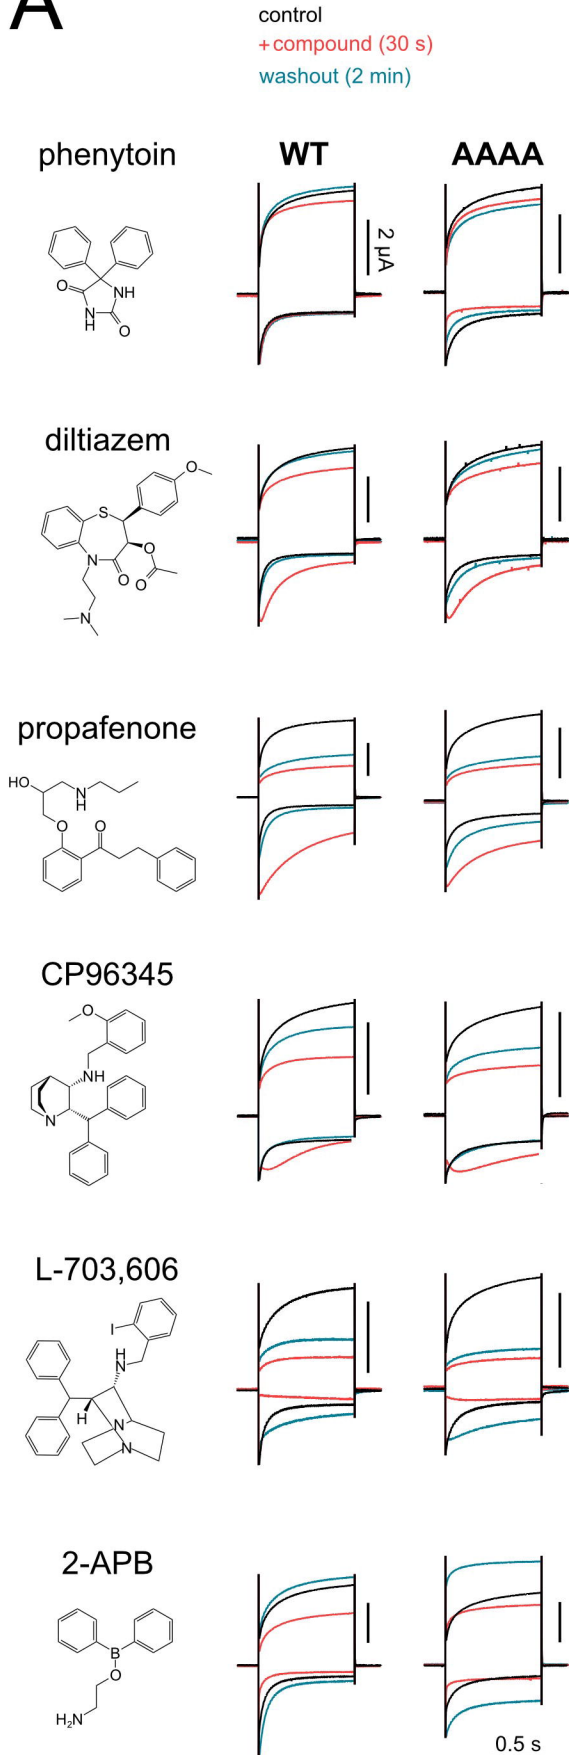**B**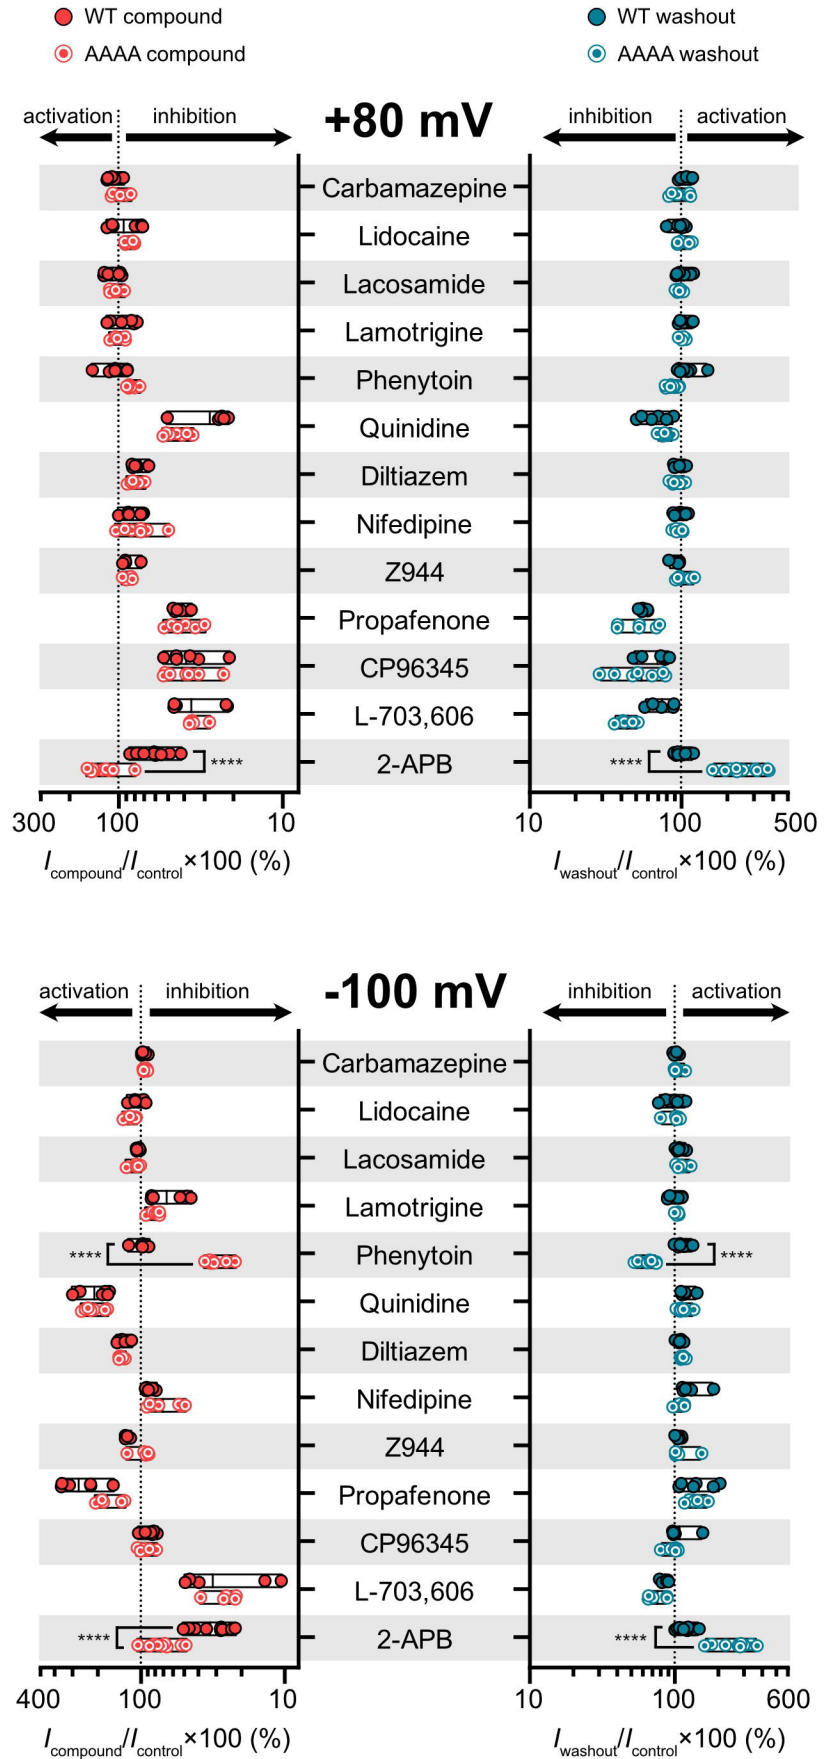

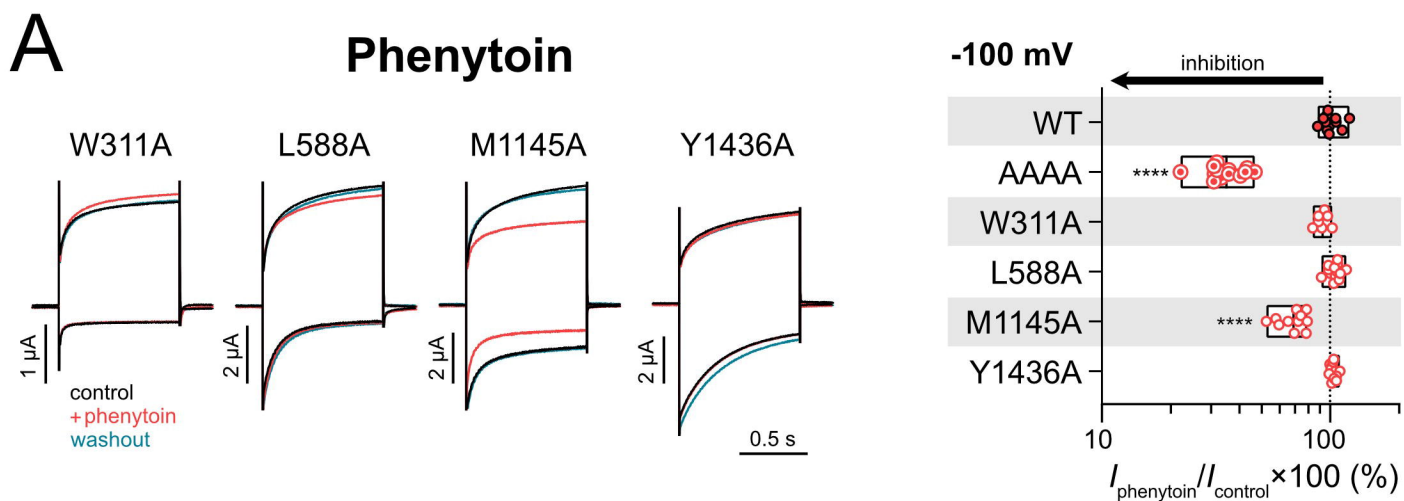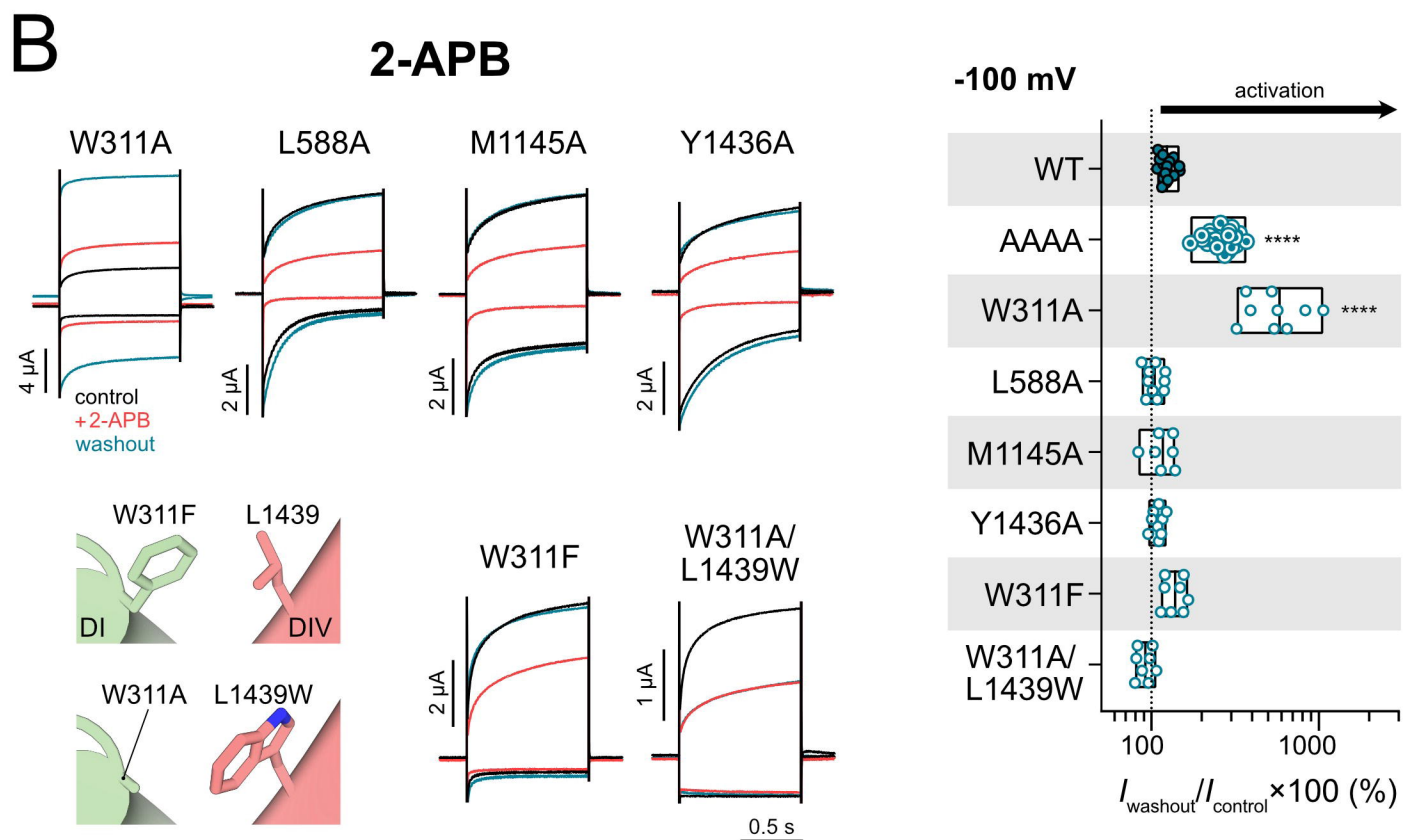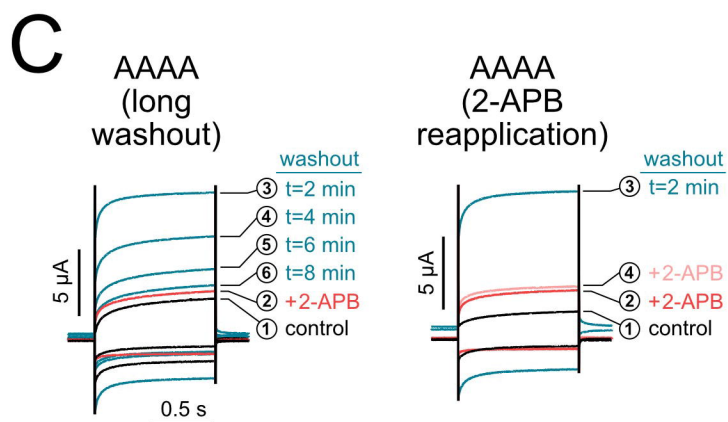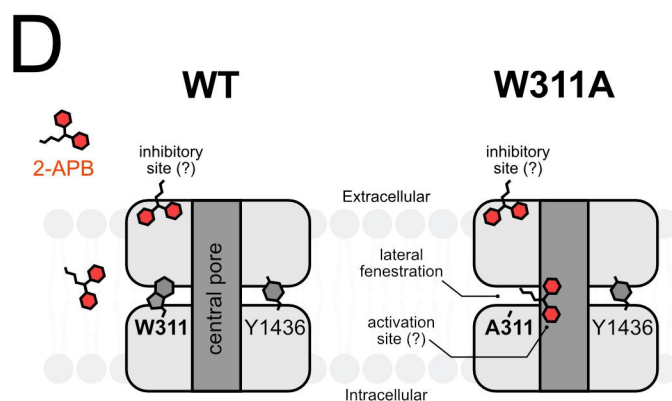

**A**

**Different states of 2-APB**

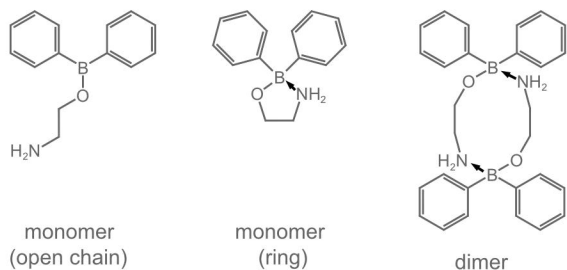

**Structural analogues of 2-APB**

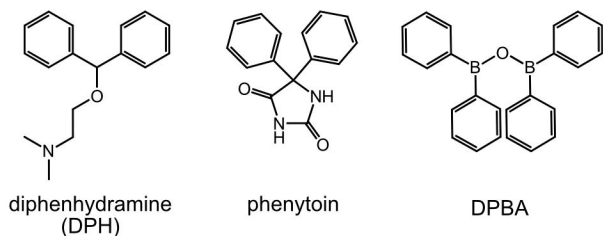

**B**

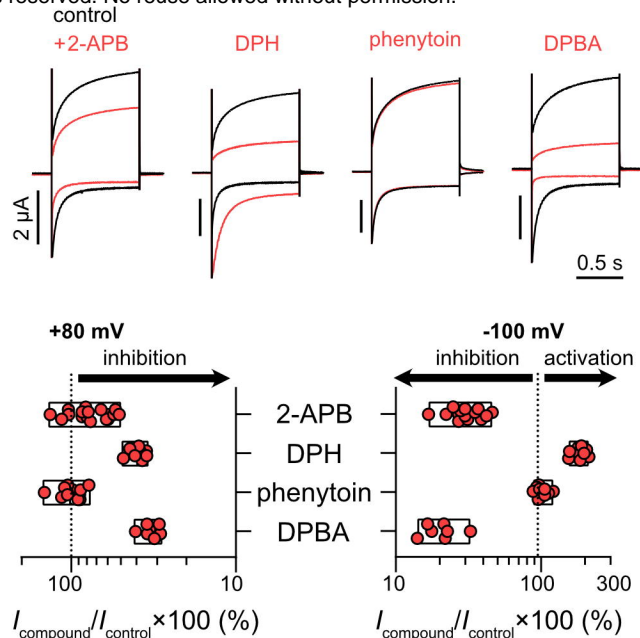

**C**

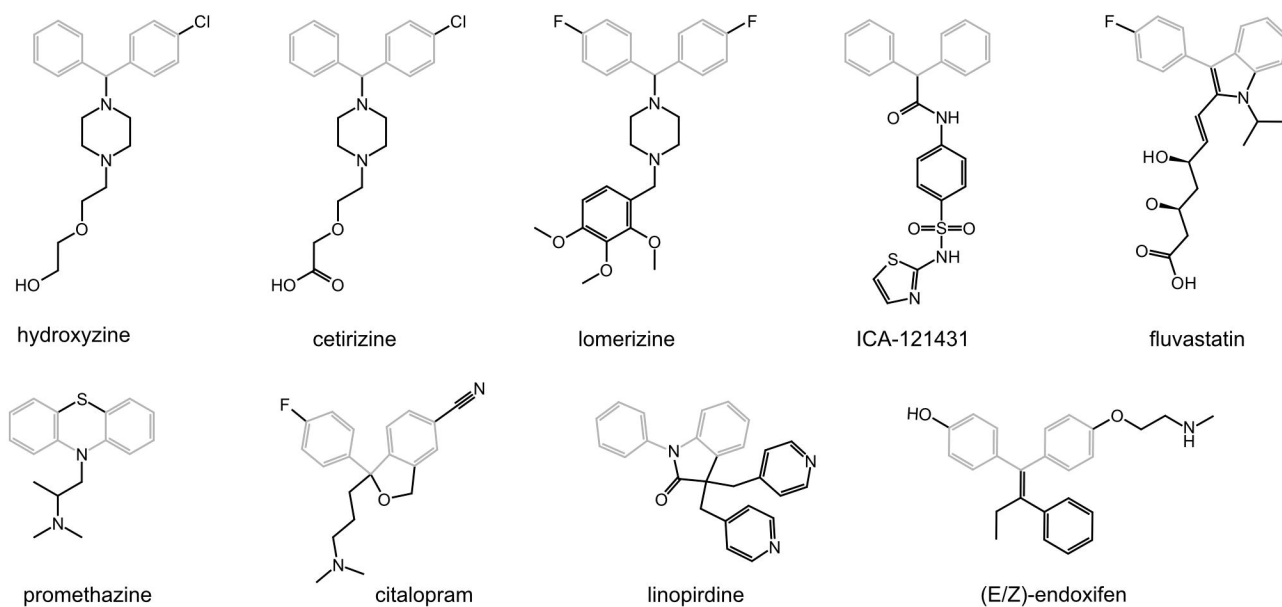

**D**

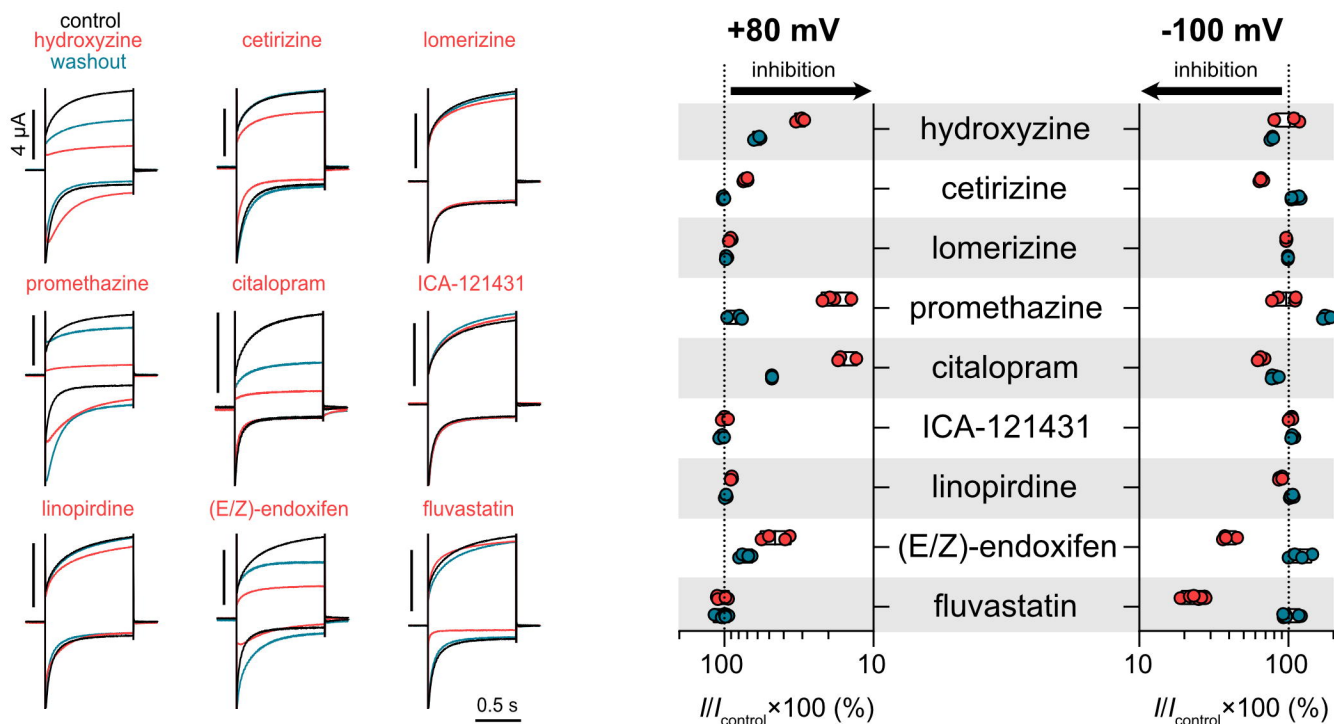

Source: https://www.biorxiv.org/content/10.1101/2023.04.12.536537v1.full.pdf
